# Supplementary material for: Influence of Nitrogen Availability on Growth of Two Transgenic Birch Species Carrying the Pine GS1a Gene
Source: MDPI journal article supplement (doi:10.3390/plants6010004), 2017-01-06
Supplement: s1 [file s1]

# Supplementary Materials: Influence of Nitrogen Availability on Growth of two Transgenic Birch Species Carrying the Pine GS1 Gene

Vadim G. Lebedev, Nina P. Kovalenko and Konstantin A. Shestibratov

```

1 TTCCCTTCCTCTGGTTTGTGTTTGGAGAGTGGCCATGTCGAGCGTATTAAACAGACCTTCTC
61 AACCTTGACCTGAGCGACGTGACAGAGAAGGTCATTGCAGAGTATATATGGATTGGAGGA
121 TCAGGAATGGATATGCGCAGTAAAGCCAGATCTCTGTCAGGACCTGTGAGTAGCGTTAAA
181 GAGCTTCCCAAATGGAAGTATGACGGCTCCAGCACTGGACAGGCTCAAGGACATGACAGC
241 GAAGTCATTCTATATCCACAAGCTATCTTCCGTGATCCATTTCGCAGAGGAAAGCACATT
301 TTGGTAATCTGTGATGCCTACTCTCCTAATGGGACTGCTATTCCCTTCCAACAAGAGGGCT
361 GCAGCAGCGAAAAATTTTAACGAAAAGGCGGTTAGTGATGAAGAGACATGGTACGGGCTT
421 GAACAAGAATATACACTGTTGCAAAAGGACGTCAAATGGCCTCTTGGCTGGCCAATTGGT
481 GGCTACCCCGGTCCTCAGGGCCCATATTACTGTGGAGTTGGAGCTGACAAAGCCTGGGGA
541 CGAGACATTGTTGATGCCATTATAAGGCTTGTCTCTATTCAGGAATCAATATCAGTGGC
601 ATCAATGGAGAAGTCATGCCAGGGCAGTGGGAATTTCAAGTAGGTCCGTCAGTGGGTATC
661 TCAGCAGCAGATGAGCTGTGGTGTGCTCGTTTTATTATGGAGAGGATTACAGAAAAGGCG
721 GGTGTCGTTCTGTCTTTGATCCCAAGCCAATTGAGGGGGACTGGAATGGTGTCTGGATGC
781 CACACAAATTACAGCACCAAGTCCATGCGCAAGGAGGGAGGCTTCGAAGTAATTAAGAAA
841 GCAATAGAAAACTGAAGTTGAGGCATAAGGAGCATATTTCTGCCTATGGGGAGGGAAAT
901 GAGAGACGCCTCACTGGTCGGCACGAGACAGCAGACATGAATACCTTTTCCTGGGGTGTT
961 GCAAATCGAGGAGCTTCAGTTAGAGTGGGCCGGGACACAGAAAAAGAAGGAAAAGGTTAT
1021 TTTGAGGACCGTCGACCTGCTTCAAACATGGATCCATACATAGTGAATTCTATGATTGCT
1081 GAGACGACCATTCTATGGAAACCTTAAATTACAAAGTGGAGGCCAGTTACACGCGTGCTC
1141 GTGGTGCTTTGCTTTGGAGGCCAGCGTCACTGATAAGCTAATATGTATGTAAATGTGATG
1201 CCAATGTTTAAGTAGGTTGGTAACTTTGCTTTGGTTGTGGGTAGACCTGAACTTTGGTCA
1261 AACAAATTCCTCTTGCTATATGGATATATATATATTTTTGTATTTGTTCTACTTGTAATA
1321 TGGCGAGGGCTTTAAAAGACTCTCTTTTACCTTTATTTATCCGTTGTGGAAGATGTATT
1381 CGACAAATTGTTTAGAATGTTTGAATATGATATATTCTTTGTG

```

**Figure S1.** Nucleotide sequence of cDNA encoding the GS1a gene from *Pinus sylvestris* (X69822). The location of primers within the sequence is indicated by a straight line for the GS up1 primer and by dotted line for the GS low1 primer. Size of amplicon is 553 bp.

1 CAATGAGCGTGACGCGTCATGGGGTCCGTAGATCAGATACTGAGAACCAACGGCCAAGAT  
 61 CATTTCAAAGAAGATTTGAGGTTCAATTAAGCTGAATTTCAATTTGAGGCTGAAATTTTCAT  
 121 TTCACATCTCCCCCTTTTTTAAACTAGAGGGCGGGTACCTTGAACAGACGCCCACACAG  
 181 AGATCGAATCCAGATTTCTAAACGGTATTTCAATTTGAGTTTCATTATTTCTTTGTTAAT  
 241 CTGGGGTTAGCTTAGAATCCAGCATTATCGATTCAAACAATTAAGAATTTATCTTTAA  
 301 ATGTGGGCCAATTCAGTTTTGTAATTCAGCATTGCTAAGGTCTTGATCTTTGATGTGATT  
 361 TTATCAAAATGAATATTCAGATTTTGATTGTTACTTGTAAGGAAATGGGATATTTTT  
 421 ATTTTGCTTCTTCTTGATGTTTTTTGTCAAAATAGTACATTAGATTGTTGTGATTCC  
 481 CTATTTTACAGCATTTTAATGTAAAGTTGGCATTTTTAATGTGGCAGGTGAGAGGAAAT  
 541 GGCAGAAAGTGAAGATATTCAGCCTCTGTCTGCGACAATGGTACCGGAATGGTCAAGGT  
 601 ATTAAGCTAGATTCATTTGTGATCTATTTTGGAGTTTAAAGATTCGATTCTTAAAGCGAT  
 661 TTTGGTAGTGATTGCTGATTTGGGATGGAAATTTGTAGGCTGGGTTGCCGGAGATGAT  
 721 GCACCAAGGGCTGTTTCCCTAGCATTGTGGGTGCGCCACGCCACACCGGTGTGATGGTT  
 781 GGTATGGGTCAAAAGGATGCGTATGTTGGTGATGAGGCACAATCAAAGAGAGGTATTTTG  
 841 ACTTTGAAATACCCAATTGAGCATGGTATTGTTAGCAATTGGGATGATATGGAGAAGATT  
 901 TGGCATCACACCTTCTACAATGAGCTCCGTGTGGCTCCTGAAGAGCATCCGGTTCTCCTT  
 961 ACGGAAGCTCCTCTTAACCCCAAGGCCAATCGTGAGAAAATGACCCAGATCATGTTTGAG  
 1021 ACCTTCAACACTCCCGCAATGTACGTTGCTATCCAGGCTGTCCTTTCCCTTTATGCCAGT  
 1081 GGTCTGTAACACTGGTAAGTGATACAATCCATTTAGTATCTGCTTTTGTGATCAAATTCATG  
 1141 CATGTTAAACGTTGTTATTGGTTTATTGCATTTGCGAGTTTCAAAATAAAATGGAGTT  
 1201 GTACTAATTGATTGATAAAACAAAATATTTGGGAAAAAAACACATCTAGATCATGAAAAAA  
 1261 AATGAAATGTGTTACTGGGAACCTGTCAAGCCCTCAATATTTCTAACTTGTAAGTTGGCA  
 1321 CAACGTATTTACCCTTTGTCAACACACAGTTCGTTTGGAAATTTATATGATATCTG  
 1381 CTGGGATCATGATCATGAAAACCAAAGAAGTTCCTTAACAACGAAAACCAAAGAAGTTT  
 1441 CTTCAACAAGCATATAGTTTATCCAGCTTGGTGATTTCATCTGGACTGTTTAATTATAG  
 1501 AGATAAATGATATGAATTGATACTTTTCACTATCAATGTGTTTTGGCTAGGTATTGTTCT  
 1561 GGAATCTGGAGATGGTGTGAGTCACACAGTTCCTATCTATGAAGGCTATGCCCTCCCA  
 1621 TGCCATTCTGCGTCTTGACCTGGCAGGCCGTGATCTCACTGATGCCCTAATGAAAATCTT  
 1681 GACTGAACGTGGCTACTCCTTCACGACCACTGCAGAGCGTGAAATTGTAAGGGACATGAA  
 1741 GGAGAACTAGCCTACATTGCTCTTGATTATGAGCAAGAGCTGGAGACAGCAAAGACCAG  
 1801 CTCATCTGTTGAGAAGAGCTATGAGCTTCCAGATGGGCAGGTATCACCATTGGAGCTGA  
 1861 AAGATTCCGTTGTCCAGAGGTCCTCTTCCAACCATCCATGATAGGGATGGAAGCTGCTGG  
 1921 CATAATGAAACAACATACAATTCTATCATGAAGTGTGATGTTGATATTAGGAAGGATCT  
 1981 CTATGGCAATATTGTTCTCAGTGGTGGCTCTACTATGTTCCCAGGCATTGCTGATAGGAT  
 2041 GAGCAAGGAAATTACAGCATTGGCTCCAGTAGCATGAAGATTAAGGTGGTTGCACCACC  
 2101 AGAAAGGAAGTACAGTGTCTGGATAGGAGGCTCCATTTTGGCATCCCTCAGCACCTTCCA  
 2161 GCAGCTACTGCGTCTATTTCTTATATATTTGGGCAGTAAACAGAAGCGGACTTTAAACCT  
 2221 GATTCTGCACATTTTGATGTCTTCATTGTTATGCCTGTGTTGATTGTTTAGCATCATT  
 2281 TGTGTTAAATGCTTAACAATATGAAATTTAATTGCAATGATTGGAAGGAGTTACTAGAA  
 2341 TAATAGTGAAGCTTCAGATGGACATTAAGTAGTTAGAAGTTATATCTGAATTCATGATCA  
 2401 GGGACGACACTTTTGGACTGTGCTTTTCTAATATGGTTGGAGAACTTGCTTTCTTTTGA  
 2461 GTGCAGATGTGGATTGCAAAGGCAGAGTATGATGAGTCCGGTCCATCAATTGTCCACAGG  
 2521 AAGTGCTTCTAATCGTGCAAAGCAAGAGGCTATTGGTCAAAAACATACTTTATACACTTT  
 2581 GTAGTACAAAAGGCTTCTAATCAAGTGGTTGCAAACTATCTTCTGCATTTTCGTTACCTC  
 2641 GTTGTCTTTCAACTGTGTTTTGCTCTGTCAAAGTCTGGAC

**Figure S2.** Nucleotide sequence of cDNA encoding the actin gene from *Populus tomentosa* (GQ988367.1). The location of primers within the sequence is indicated by a straight line for the Actin 1 up primer and by dotted line for the Actin 1 low primer. Size of amplicon is 561 bp.
